# Supplementary material for: Genome-wide DNA methylation analysis reveals that mouse chemical iPSCs have closer epigenetic features to mESCs than OSKM-integrated iPSCs
Source: PubMed Central journal article supplement (PMC5833453; doi:10.1038/s41419-017-0234-x), 2018-02-07

# Supplementary Figure 1

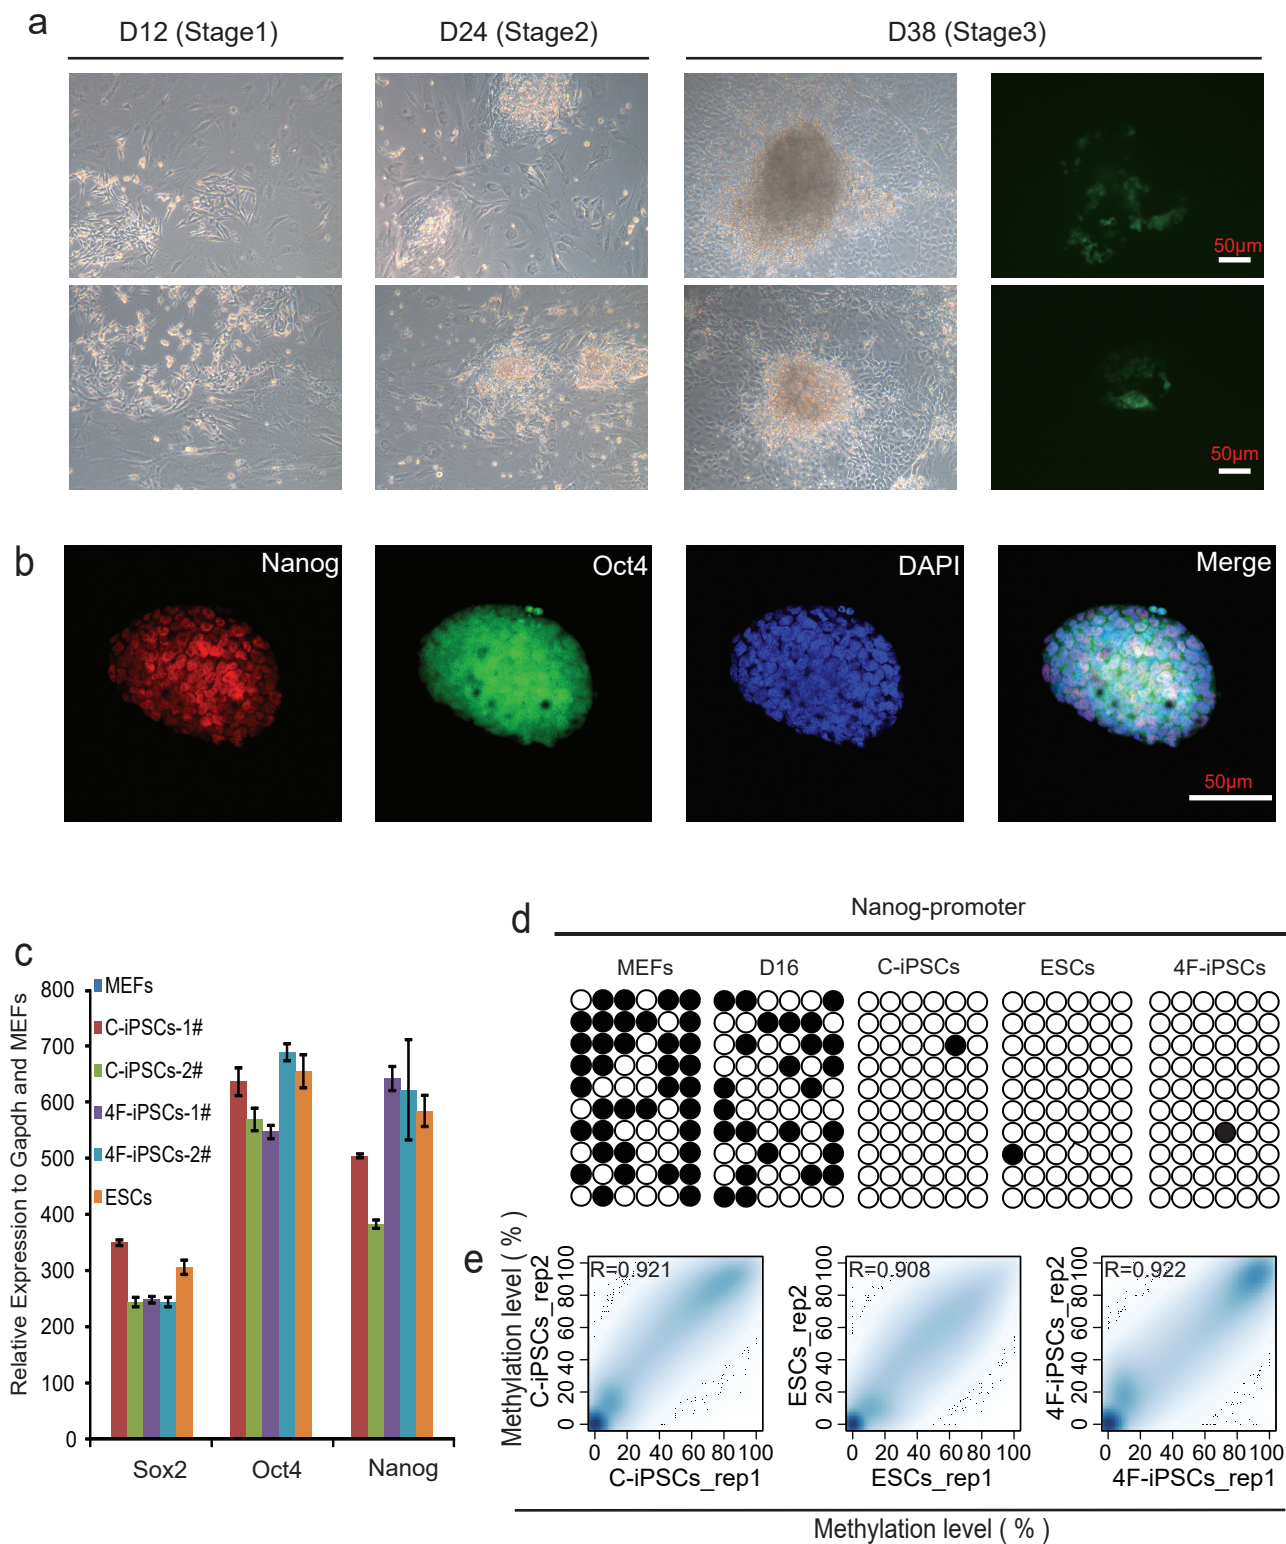

# Supplementary Figure 2

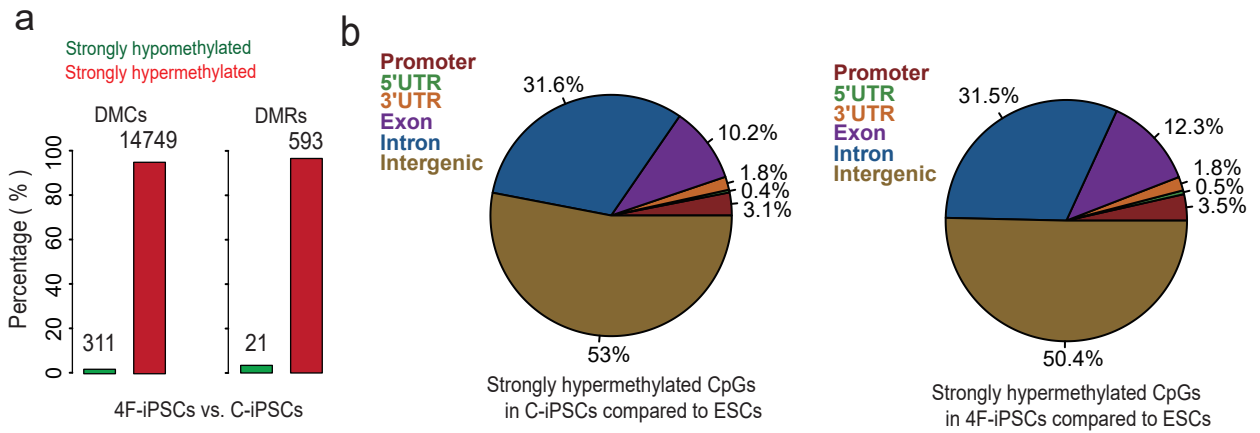

# Supplementary Figure 3

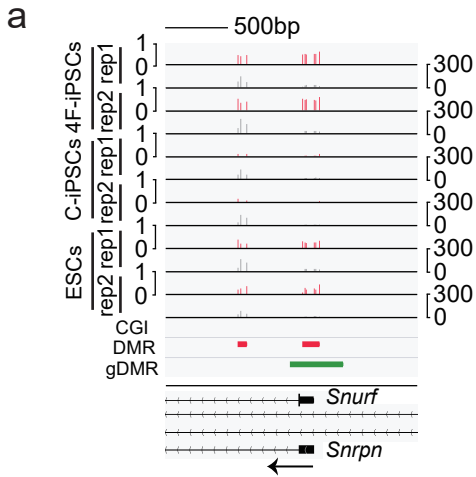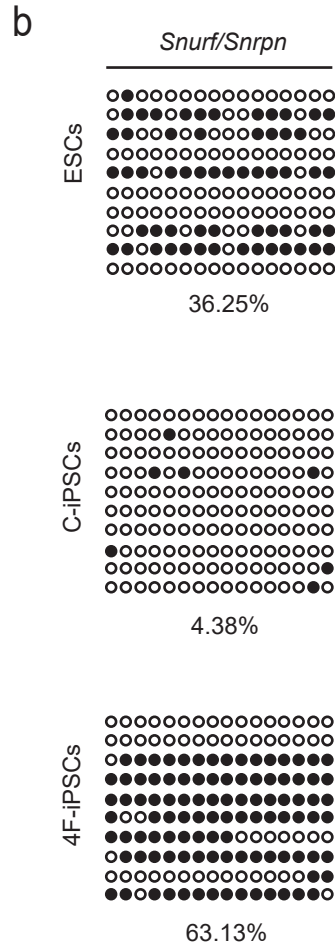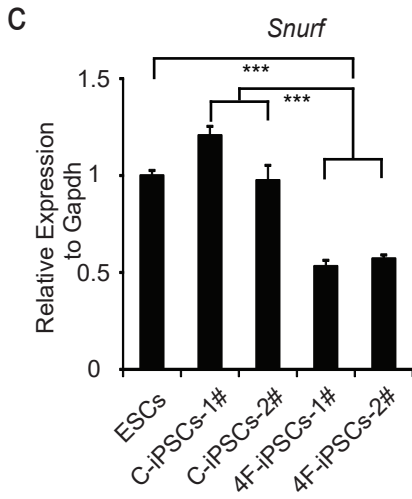

# Supplementary Figure 4

a

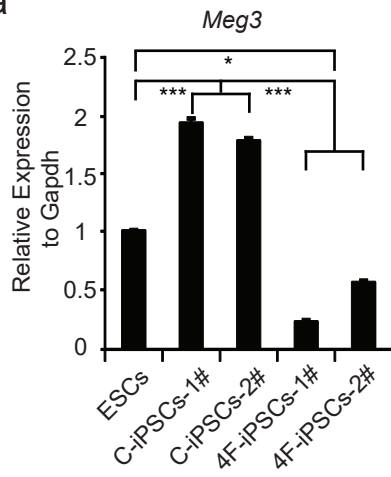

b

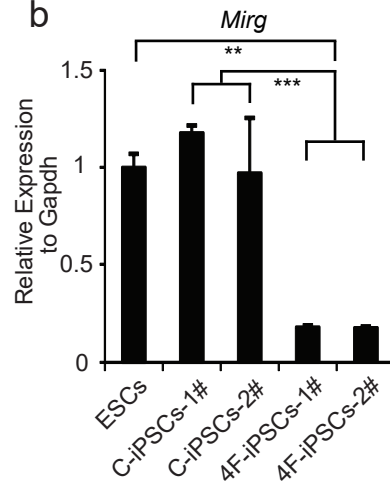



# Supplementary Figure 5

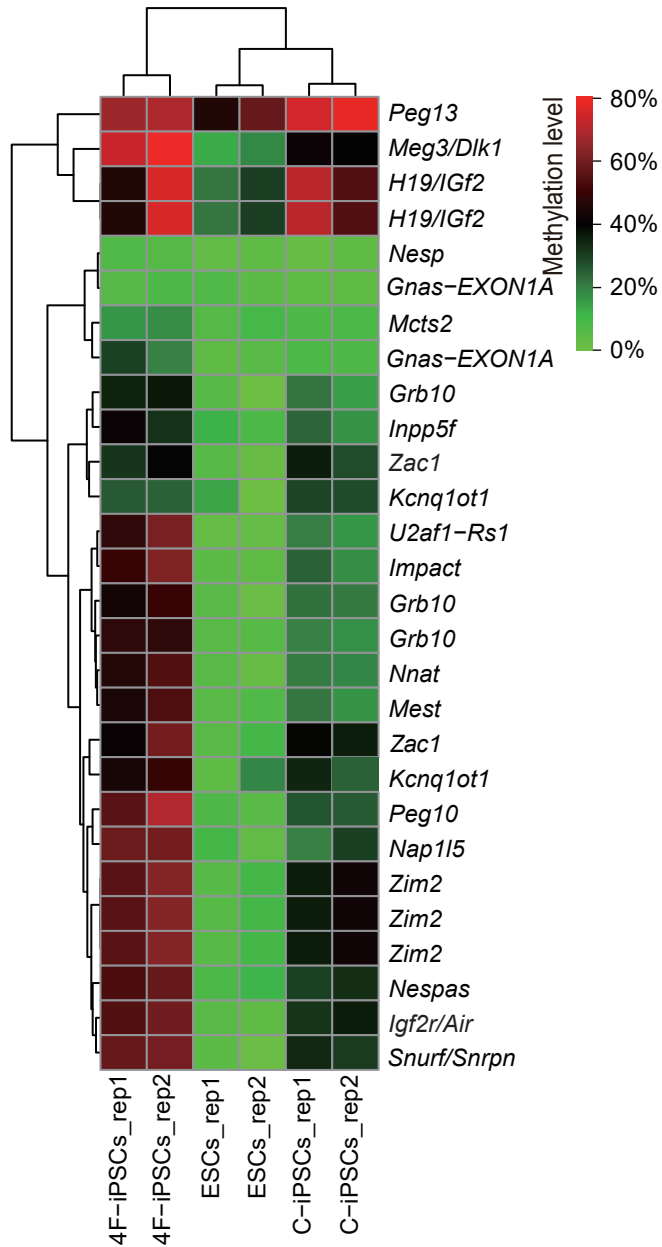

Supplement: 41419_2017_234_MOESM2_ESM.pdf [file 41419_2017_234_MOESM2_ESM.pdf]
